# Supplementary material for: Clinical Implications of Estimated Glomerular Filtration Rate Dip Following Sodium‐Glucose Cotransporter‐2 Inhibitor Initiation on Cardiovascular and Kidney Outcomes
Source: PubMed Central journal article supplement — J Am Heart Assoc. 2021 May 20;10(11):e020237. doi: 10.1161/JAHA.120.020237 (PMC8483543; doi:10.1161/jaha.120.020237), 2021-05-20
Supplement: JAH3-10-e020237-s001.pdf [file JAH3-10-e020237-s001.pdf]

# **SUPPLEMENTAL MATERIAL**

**Table S1. Distribution of antihyperglycemics at treatment initiation.**

| <b>Medication class</b>      | <b>Medication names</b>                                         | <b>Distribution at treatment initiation</b> |
|------------------------------|-----------------------------------------------------------------|---------------------------------------------|
| SGLT2i                       | Empagliflozin                                                   | 36638 (14.91%)                              |
| Biguanide                    | Metformin                                                       | 58873 (23.96%)                              |
| Insulin                      | Insulin                                                         | 33563 (13.66%)                              |
| Sulfonylureas                | Glyburide, Glipizide, Glimepiride                               | 56568 (23.03%)                              |
| DPP4                         | Alogliptin, Sitagliptin, Saxagliptin, Linagliptin               | 31744 (12.92%)                              |
| GLP1                         | Liraglutide, Exenatide, Semaglutide, Dulaglutide, Lixisenatide, | 15646 (6.37%)                               |
| Thiazolidinediones           | Pioglitazone, Rosiglitazone                                     | 10428 (4.24%)                               |
| Alpha-glucosidase inhibitors | Miglitol, Acarbose                                              | 1902 (0.77%)                                |
| Meglitinides                 | Nateglinide, Repaglinide                                        | 283 (0.12%)                                 |
| Amylin analogues             | Pramlintide                                                     | 18 (0.01%)                                  |

SGLT2i=sodium-glucose co-transporter-2 inhibitor. DPP4=dipeptidyl peptidase-4 inhibitor. GLP1=glucagon-like peptide-1 receptor agonist.

**Table S2. Unadjusted rate of eGFR dip>10% and dip> 30% in SGLT2i and the other antihyperglycemics group.**

|                                                | Unadjusted rate of eGFR dip>10% per 100 patients<br>(95% Confidence interval) |                          | Unadjusted rate of eGFR dip>30% per 100 patients<br>(95% Confidence interval) |                          |
|------------------------------------------------|-------------------------------------------------------------------------------|--------------------------|-------------------------------------------------------------------------------|--------------------------|
|                                                | SGLT2i                                                                        | Other antihyperglycemics | SGLT2i                                                                        | Other antihyperglycemics |
| <b>Overall cohort</b>                          | 44.16<br>(43.66, 44.67)                                                       | 30.37<br>(30.17, 30.56)  | 6.35<br>(6.10, 6.60)                                                          | 4.12<br>(4.03, 4.20)     |
| <b>Race-White</b>                              | 43.03<br>(42.44, 43.62)                                                       | 29.7<br>(29.47, 29.94)   | 5.97<br>(5.70, 6.26)                                                          | 3.94<br>(3.84, 4.04)     |
| <b>Race-Black</b>                              | 49.31<br>(47.97, 50.66)                                                       | 31.42<br>(30.96, 31.88)  | 7.80<br>(7.11, 8.55)                                                          | 4.15<br>(3.96, 4.36)     |
| <b>Race-Other</b>                              | 45.02<br>(43.51, 46.53)                                                       | 32.69<br>(32.10, 33.29)  | 6.95<br>(6.22, 7.76)                                                          | 5.16<br>(4.88, 5.44)     |
| <b>eGFR≥90 mL/min/1.73 m<sup>2</sup></b>       | 30.77<br>(29.88, 31.68)                                                       | 22.72<br>(22.38, 23.06)  | 3.38<br>(3.04, 3.75)                                                          | 2.39<br>(2.27, 2.52)     |
| <b>90&gt;eGFR≥60 mL/min/1.73 m<sup>2</sup></b> | 47.42<br>(46.72, 48.11)                                                       | 31.09<br>(30.8, 31.38)   | 6.34<br>(6.01, 6.69)                                                          | 3.58<br>(3.46, 3.70)     |
| <b>60&gt;eGFR≥45 mL/min/1.73 m<sup>2</sup></b> | 54.14<br>(52.86, 55.41)                                                       | 34.67<br>(34.18, 35.17)  | 10.66<br>(9.9, 11.48)                                                         | 5.65<br>(5.42, 5.89)     |
| <b>45&gt;eGFR≥30 mL/min/1.73 m<sup>2</sup></b> | 60.26<br>(56.73, 63.70)                                                       | 42.00<br>(41.29, 42.72)  | 12.72<br>(10.53, 15.3)                                                        | 9.38<br>(8.96, 9.81)     |
| <b>No albuminuria (≤30 mg/g)</b>               | 38.46<br>(37.67, 39.26)                                                       | 26.20<br>(25.91, 26.49)  | 4.13<br>(3.82, 4.47)                                                          | 2.59<br>(2.49, 2.70)     |
| <b>Microalbuminuria (&gt;30- ≤300 mg/g)</b>    | 45.98<br>(45.26, 46.69)                                                       | 31.57<br>(31.28, 31.85)  | 7.02<br>(6.66, 7.39)                                                          | 4.54<br>(4.42, 4.67)     |
| <b>Macroalbuminuria (&gt;300 mg/g)</b>         | 57.58<br>(55.96, 59.18)                                                       | 43.65<br>(42.94, 44.37)  | 11.76<br>(10.75, 12.85)                                                       | 9.08<br>(8.68, 9.50)     |
| <b>Congestive heart failure *</b>              | 56.21<br>(54.54, 57.86)                                                       | 43.33<br>(42.48, 44.19)  | 12.21<br>(11.15, 13.35)                                                       | 9.69<br>(9.19, 10.21)    |
| <b>Acute Kidney Injury *</b>                   | 55.24<br>(53.48, 56.98)                                                       | 44.84<br>(44.13, 45.55)  | 13.09<br>(11.95, 14.33)                                                       | 11.50<br>(11.05, 11.96)  |
| <b>ACE/ARB *</b>                               | 45.86<br>(45.25, 46.47)                                                       | 31.89<br>(31.63, 32.16)  | 7.01<br>(6.71, 7.33)                                                          | 4.74<br>(4.62, 4.86)     |
| <b>Loop diuretics *</b>                        | 54.94<br>(53.68, 56.20)                                                       | 40.93<br>(40.32, 41.54)  | 11.09<br>(10.32, 11.91)                                                       | 8.51<br>(8.17, 8.86)     |
| <b>Non-loop diuretics *</b>                    | 48.52<br>(47.53, 49.51)                                                       | 31.90<br>(31.50, 32.31)  | 7.77<br>(7.25, 8.32)                                                          | 4.29<br>(4.12, 4.47)     |

SGLT2i=sodium-glucose co-transporter-2 inhibitor. eGFR=estimated glomerular filtration rate. HbA1c=glycated hemoglobin. ACE/ARB=angiotensin converting enzyme inhibitors/angiotensin-receptor blockers.

\* Within patients with history of the disease or used the medication

**Table S3. Adjusted rates of eGFR dip>10% in SGLT2i and the other antihyperglycemics group**

|                                                | Adjusted odds ratio<br>(95% confidence interval) | Adjusted rate per 100 patients<br>(95% confidence interval) |                          | Excess rate per 100 patients associated with SGLT2i<br>(95% confidence interval) |
|------------------------------------------------|--------------------------------------------------|-------------------------------------------------------------|--------------------------|----------------------------------------------------------------------------------|
|                                                |                                                  | SGLT2i                                                      | Other antihyperglycemics |                                                                                  |
| <b>Overall cohort</b>                          | 1.54<br>(1.47, 1.61)                             | 40.65<br>(40.11, 41.19)                                     | 30.79<br>(30.59, 30.98)  | 9.86<br>(8.83, 11.00)                                                            |
| <b>Race-White</b>                              | 1.48<br>(1.41, 1.57)                             | 39.10<br>(38.49, 39.72)                                     | 30.19<br>(29.96, 30.43)  | 8.91<br>(7.77, 10.01)                                                            |
| <b>Race-Black</b>                              | 1.93<br>(1.72, 2.18)                             | 47.22<br>(45.7, 48.74)                                      | 31.62<br>(31.17, 32.08)  | 15.60<br>(12.81, 18.65)                                                          |
| <b>Race-Other</b>                              | 1.45<br>(1.26, 1.66)                             | 41.65<br>(40.05, 43.27)                                     | 33.05<br>(32.46, 33.65)  | 8.40<br>(5.38, 11.88)                                                            |
| <b>eGFR≥90 mL/min/1.73 m<sup>2</sup></b>       | 1.28<br>(1.16, 1.41)                             | 27.30<br>(26.36, 28.26)                                     | 22.71<br>(22.37, 23.05)  | 4.59<br>(2.75, 6.51)                                                             |
| <b>90&gt;eGFR≥60 mL/min/1.73 m<sup>2</sup></b> | 1.62<br>(1.53, 1.72)                             | 43.00<br>(42.26, 43.74)                                     | 31.76<br>(31.47, 32.05)  | 11.28<br>(9.78, 12.64)                                                           |
| <b>60&gt;eGFR≥45 mL/min/1.73 m<sup>2</sup></b> | 1.63<br>(1.47, 1.81)                             | 47.14<br>(45.79, 48.50)                                     | 35.3<br>(34.81, 35.80)   | 11.84<br>(9.06, 14.75)                                                           |
| <b>45&gt;eGFR≥30 mL/min/1.73 m<sup>2</sup></b> | 1.49<br>(1.13, 1.95)                             | 52.03<br>(48.26, 55.79)                                     | 42.21<br>(41.5, 42.93)   | 9.78<br>(3.35, 16.55)                                                            |
| <b>No albuminuria (≤30 mg/g)</b>               | 1.43<br>(1.33, 1.54)                             | 33.96<br>(33.14, 34.80)                                     | 26.43<br>(26.14, 26.72)  | 7.53<br>(5.99, 9.20)                                                             |
| <b>Microalbuminuria (&gt;30- ≤300 mg/g)</b>    | 1.63<br>(1.53, 1.74)                             | 43.49<br>(42.73, 44.26)                                     | 32.05<br>(31.76, 32.33)  | 11.44<br>(9.94, 12.91)                                                           |
| <b>Macroalbuminuria (&gt;300 mg/g)</b>         | 1.48<br>(1.29, 1.7)                              | 53.60<br>(51.85, 55.34)                                     | 43.83<br>(43.11, 44.54)  | 9.77<br>(6.40, 13.09)                                                            |
| <b>Congestive heart failure *</b>              | 1.41<br>(1.22, 1.62)                             | 52.02<br>(50.27, 53.77)                                     | 43.55<br>(42.7, 44.4)    | 8.47<br>(5.18, 1.76)                                                             |
| <b>Acute Kidney Injury *</b>                   | 1.30<br>(1.11, 1.54)                             | 51.81<br>(49.9, 53.72)                                      | 45.20<br>(44.49, 45.9)   | 6.61<br>(2.96, 11.04)                                                            |
| <b>ACE/ARB *</b>                               | 1.57<br>(1.50, 1.66)                             | 42.95<br>(42.31, 43.6)                                      | 32.35<br>(32.09, 32.62)  | 10.60<br>(9.27, 11.90)                                                           |
| <b>Loop diuretics *</b>                        | 1.45<br>(1.30, 1.61)                             | 50.53<br>(49.20, 51.86)                                     | 41.38<br>(40.78, 41.99)  | 9.15<br>(6.52, 12.01)                                                            |
| <b>Non-loop diuretics *</b>                    | 1.66<br>(1.53, 1.81)                             | 44.40<br>(43.35, 45.46)                                     | 32.44<br>(32.04, 32.84)  | 11.96<br>(9.76, 13.87)                                                           |

SGLT2i=sodium-glucose co-transporter-2 inhibitor. eGFR=estimated glomerular filtration rate. HbA1c=glycated hemoglobin. ACE/ARB=angiotensin converting enzyme inhibitors/angiotensin-receptor blockers. Model adjusted for covariates measured at treatment initiation.  
 \* Within patients with history of the disease or used the medication

**Adjusted rates of eGFR dip>30% in SGLT2i and the other antihyperglycemics group**

|                       | Adjusted odds ratio<br>(95% confidence interval) | Adjusted rate per 100 patients<br>(95% confidence interval) |                          | Excess rate per 100 patients associated with SGLT2i (95% confidence interval) |
|-----------------------|--------------------------------------------------|-------------------------------------------------------------|--------------------------|-------------------------------------------------------------------------------|
|                       |                                                  | SGLT2i                                                      | Other antihyperglycemics |                                                                               |
| <b>Overall cohort</b> | 1.28<br>(1.17, 1.41)                             | 5.40<br>(5.16, 5.66)                                        | 4.26<br>(4.17, 4.34)     | 1.15<br>(0.70, 1.62)                                                          |

|                                                    |                      |                         |                         |                        |
|----------------------------------------------------|----------------------|-------------------------|-------------------------|------------------------|
| <b>Race-White</b>                                  | 1.22<br>(1.09, 1.37) | 4.93<br>(4.66, 5.21)    | 4.07<br>(3.97, 4.17)    | 0.86<br>(0.39, 1.36)   |
| <b>Race-Black</b>                                  | 1.95<br>(1.55, 2.47) | 8.10<br>(7.31, 8.97)    | 4.32<br>(4.12, 4.52)    | 3.80<br>(2.03, 5.63)   |
| <b>Race-Other</b>                                  | 0.97<br>(0.77, 1.21) | 5.17<br>(4.49, 5.95)    | 5.34<br>(5.07, 5.64)    | -0.17<br>(-1.20, 1.02) |
| <b>eGFR≥90<br/>mL/min/1.73 m<sup>2</sup></b>       | 1.18<br>(0.92, 1.51) | 2.91<br>(2.57, 3.29)    | 2.48<br>(2.36, 2.61)    | 0.43<br>(-0.24, 1.16)  |
| <b>90&gt;eGFR≥60<br/>mL/min/1.73 m<sup>2</sup></b> | 1.36<br>(1.20, 1.53) | 5.03<br>(4.71, 5.36)    | 3.76<br>(3.64, 3.88)    | 1.27<br>(0.72, 1.81)   |
| <b>60&gt;eGFR≥45<br/>mL/min/1.73 m<sup>2</sup></b> | 1.39<br>(1.18, 1.64) | 7.97<br>(7.26, 8.73)    | 5.85<br>(5.62, 6.1)     | 2.11<br>(0.97, 3.37)   |
| <b>45&gt;eGFR≥30<br/>mL/min/1.73 m<sup>2</sup></b> | 1.3<br>(0.84, 2.01)  | 11.94<br>(9.7, 14.61)   | 9.46<br>(9.04, 9.89)    | 2.48<br>(-1.67, 6.98)  |
| <b>No albuminuria<br/>(≤30 mg/g)</b>               | 1.19<br>(0.99, 1.43) | 3.15<br>(2.85, 3.47)    | 2.65<br>(2.55, 2.76)    | 0.49<br>(-0.02, 1.10)  |
| <b>Microalbuminuria<br/>(&gt;30- ≤300 mg/g)</b>    | 1.35<br>(1.19, 1.53) | 6.24<br>(5.88, 6.62)    | 4.71<br>(4.58, 4.84)    | 1.53<br>(0.84, 2.28)   |
| <b>Macroalbuminuria<br/>(&gt;300 mg/g)</b>         | 1.13<br>(0.92, 1.39) | 10.18<br>(9.17, 11.29)  | 9.1<br>(8.7, 9.53)      | 1.08<br>(-0.67, 2.99)  |
| <b>Congestive heart<br/>failure *</b>              | 1.30<br>(1.04, 1.63) | 12.29<br>(11.19, 13.49) | 9.71<br>(9.21, 10.23)   | 2.58<br>(0.23, 5.00)   |
| <b>Acute Kidney<br/>Injury *</b>                   | 1.00<br>(0.77, 1.29) | 11.68<br>(10.51, 12.96) | 11.72<br>(11.27, 12.18) | -0.04<br>(-2.36, 3.09) |
| <b>ACE/ARB *</b>                                   | 1.29<br>(1.16, 1.43) | 6.22<br>(5.92, 6.54)    | 4.90<br>(4.78, 5.03)    | 1.32<br>(0.69, 1.97)   |
| <b>Loop diuretics *</b>                            | 1.18<br>(0.99, 1.40) | 10.19<br>(9.41, 11.02)  | 8.79<br>(8.44, 9.14)    | 1.40<br>(-0.09, 3.24)  |
| <b>Non-loop<br/>diuretics *</b>                    | 1.46<br>(1.25, 1.71) | 6.31<br>(5.81, 6.84)    | 4.41<br>(4.24, 4.59)    | 1.90<br>(1.13, 2.77)   |

SGLT2i=sodium-glucose co-transporter-2 inhibitor. eGFR=estimated glomerular filtration rate. HbA1c=glycated hemoglobin. ACE/ARB=angiotensin converting enzyme inhibitors/angiotensin-receptor blockers. Model adjusted for covariates measured at treatment initiation.

\* Within patients with history of the disease or used the medication

**Table S4. Risk of composite cardiovascular and kidney outcomes associated with SGLT2i (vs. other antihyperglycemics) based on mediation analyses.**

|                                           | <b>Mediator</b>        | <b>Hazard ratio of total effect accounted for mediator (95% confidence interval)</b> | <b>Hazard ratio independent of the mediator (95% confidence interval)</b> | <b>Magnitude of effect abrogated by the mediator (95% confidence interval)</b> |
|-------------------------------------------|------------------------|--------------------------------------------------------------------------------------|---------------------------------------------------------------------------|--------------------------------------------------------------------------------|
| <b>Composite cardiovascular outcome *</b> | <b>eGFR Dip&gt;10%</b> | 0.92<br>(0.84, 0.99)                                                                 | 0.88<br>(0.81, 0.92)                                                      | -3.78<br>(-5.44, -2.22)                                                        |
|                                           | <b>eGFR Dip&gt;30%</b> |                                                                                      | 0.90<br>(0.82, 0.98)                                                      | -1.18<br>(-2.22, -0.62)                                                        |
| <b>Composite Kidney outcome †</b>         | <b>eGFR Dip&gt;10%</b> | 0.78<br>(0.71, 0.87)                                                                 | 0.73<br>(0.65, 0.82)                                                      | -4.76<br>(-6.85, -3.17)                                                        |
|                                           | <b>eGFR Dip&gt;30%</b> |                                                                                      | 0.76<br>(0.68, 0.86)                                                      | -1.66<br>(-3.01, -0.87)                                                        |

Mediation analyses based on inverse odds ratio-weighting for causal mediation analysis and adjusted for covariates measured at treatment initiation.

The total effect accounted for eGFR dipping as the mediator. The hazard ratio independent of mediator represent the effect which was not mediated by eGFR dip. The magnitude of effect abrogated by the mediator was estimated from the difference between hazard ratios independent of eGFR dip and the hazard ratios for the total effect.

\* Composite cardiovascular outcome was defined as non-fatal myocardial infarction, non-fatal stroke, hospitalization for heart failure or all-cause mortality

† Composite kidney outcome was defined as eGFR decline>50%, ESKD or all-cause mortality

**Table S5. Risk of composite cardiovascular and kidney outcomes associated with SGLT2i by predicted probability of SGLT2i related eGFR dip.**

| <b>Outcomes</b>                           | <b>Group based on probability of eGFR dip</b> | <b>Adjusted hazard ratio (95% confidence interval)</b> | <b>Event rate difference per 100 patient-years (95% confidence interval)</b> |
|-------------------------------------------|-----------------------------------------------|--------------------------------------------------------|------------------------------------------------------------------------------|
| <b>Composite cardiovascular outcome *</b> | High probability of dip>10%                   | 0.92<br>(0.85, 0.99)                                   | -0.60<br>(-1.24, -0.05)                                                      |
|                                           | Low probability of dip>10%                    | 0.84<br>(0.77, 0.93)                                   | -1.30<br>(-2.04, -0.58)                                                      |
|                                           | High probability of dip>30%                   | 0.89<br>(0.82, 0.97)                                   | -0.95<br>(-1.65, -0.22)                                                      |
|                                           | Low probability of dip>30%                    | 0.89<br>(0.82, 0.97)                                   | -0.88<br>(-1.48, -0.24)                                                      |
| <b>Composite kidney outcome †</b>         | High probability of dip>10%                   | 0.72<br>(0.65, 0.79)                                   | -0.86<br>(-1.41, -0.31)                                                      |
|                                           | Low probability of dip>10%                    | 0.62<br>(0.55, 0.69)                                   | -1.67<br>(-2.27, -1.03)                                                      |
|                                           | High probability of dip>30%                   | 0.70<br>(0.62, 0.78)                                   | -0.83<br>(-1.52, -0.05)                                                      |
|                                           | Low probability of dip>30%                    | 0.66<br>(0.60, 0.73)                                   | -1.48<br>(-1.96, -0.92)                                                      |

High and low probability of eGFR dip categorized based on probability of eGFR dipping associated with SGLT2i above or below the average, which are 11.64% for dip>10% and 1.92% for dip>30%. Model adjusted for covariates measured at treatment initiation.

\* Composite cardiovascular outcome was defined as non-fatal myocardial infarction, non-fatal stroke, hospitalization for heart failure or all-cause mortality

† Composite kidney outcome was defined as eGFR decline>50%, ESKD or all-cause mortality

**Table S6. Characteristics associated with discontinuation among SGLT2i users.**

|                                                      | <b>Prevalence (%)</b> | <b>Discontinuation rate per 100 patients * (95% confidence interval)</b> | <b>Adjusted odds ratio (95% confidence interval)</b> |
|------------------------------------------------------|-----------------------|--------------------------------------------------------------------------|------------------------------------------------------|
| <b>eGFR dip category</b>                             |                       |                                                                          |                                                      |
| <b>No dip or dip≤10% (reference)</b>                 | 20454 (55.84)         | 22.10<br>(21.53, 22.67)                                                  | 1.00                                                 |
| <b>10%&lt; dip≤ 30%</b>                              | 13850 (37.81)         | 20.12<br>(19.46, 20.79)                                                  | 0.83<br>(0.78, 0.87)                                 |
| <b>Dip&gt; 30%</b>                                   | 2326 (6.35)           | 29.58<br>(27.72, 31.43)                                                  | 1.23<br>(1.11, 1.36)                                 |
| <b>Adverse events</b>                                |                       |                                                                          |                                                      |
| <b>Bone fracture</b>                                 | 263 (0.72)            | 25.10<br>(19.86, 30.33)                                                  | 1.07<br>(0.80, 1.39)                                 |
| <b>Amputation</b>                                    | 40 (0.11)             | 45.00<br>(29.58, 60.42)                                                  | 2.85<br>(1.44, 5.66)                                 |
| <b>Diabetic ketoacidosis</b>                         | 38 (0.10)             | 31.58<br>(16.80, 46.36)                                                  | 1.49<br>(0.73, 3.02)                                 |
| <b>Hypoglycemia</b>                                  | 820 (2.24)            | 26.46<br>(23.44, 29.48)                                                  | 1.07<br>(0.91, 1.26)                                 |
| <b>Pancreatitis</b>                                  | 295 (0.81)            | 27.46<br>(22.37, 32.55)                                                  | 1.24<br>(0.94, 1.62)                                 |
| <b>Bladder &amp; urinary tract infections</b>        | 521 (1.42)            | 45.11<br>(40.83, 49.38)                                                  | 2.58<br>(2.15, 3.10)                                 |
| <b>Venous thromboembolism</b>                        | 141 (0.38)            | 24.82<br>(17.69, 31.95)                                                  | 1.08<br>(0.73, 1.62)                                 |
| <b>Hospitalization not related to adverse events</b> | 2326 (6.35)           | 29.58<br>(27.72, 31.43)                                                  | 1.50<br>(1.33, 1.69)                                 |
| <b>Increased HbA1c</b>                               | 8413 (22.97)          | 30.81<br>(29.82, 31.80)                                                  | 1.90<br>(1.80, 2.02)                                 |

Characteristics were evaluated within 6 months after treatment initiation. Model adjusted for covariates measured at treatment initiation.

\* Discontinuation rate per 100 patients within those with the characteristics



**Table S7. Risk of composite cardiovascular and kidney outcomes associated with SGLT2i continuation vs. discontinuation by eGFR dipping category.**

| <b>Outcomes</b>                           | <b>Group</b>             | <b>Adjusted hazard ratio (95% confidence interval)</b> | <b>Adjusted event rate per 100 patient-years in those who continue SGLT2i (95% confidence interval)</b> | <b>Adjusted event rate per 100 patient-years in those who discontinue SGLT2i (95% confidence interval)</b> | <b>Event rate difference per 100 patient-years (95% confidence interval)</b> |
|-------------------------------------------|--------------------------|--------------------------------------------------------|---------------------------------------------------------------------------------------------------------|------------------------------------------------------------------------------------------------------------|------------------------------------------------------------------------------|
| <b>Composite cardiovascular outcome *</b> | <b>Overall</b>           | 0.80<br>(0.72, 0.88)                                   | 5.28<br>(5.01, 5.59)                                                                                    | 6.58<br>(6.05, 7.16)                                                                                       | -1.31<br>(-1.89, -0.74)                                                      |
|                                           | <b>No dip or dip≤10%</b> | 0.76<br>(0.66, 0.88)                                   | 4.41<br>(4.05, 4.76)                                                                                    | 5.76<br>(5.09, 6.53)                                                                                       | -1.34<br>(-2.18, -0.58)                                                      |
|                                           | <b>Dip&gt; 10%</b>       | 0.84<br>(0.73, 0.97)                                   | 6.43<br>(5.92, 6.97)                                                                                    | 7.61<br>(6.74, 8.54)                                                                                       | -1.16<br>(-2.22, -0.20)                                                      |
|                                           | <b>Dip&gt; 30%</b>       | 0.73<br>(0.55, 0.97)                                   | 8.50<br>(7.00, 10.06)                                                                                   | 11.63<br>(9.17, 14.45)                                                                                     | -3.06<br>(-5.81, -0.24)                                                      |
| <b>Composite kidney outcome †</b>         | <b>Overall</b>           | 0.72<br>(0.63, 0.82)                                   | 2.76<br>(2.52, 2.98)                                                                                    | 3.81<br>(3.37, 4.20)                                                                                       | -1.06<br>(-1.47, -0.59)                                                      |
|                                           | <b>No dip or dip≤10%</b> | 0.74<br>(0.60, 0.91)                                   | 1.92<br>(1.67, 2.15)                                                                                    | 2.62<br>(2.09, 3.10)                                                                                       | -0.68<br>(-1.18, -0.16)                                                      |
|                                           | <b>Dip&gt; 10%</b>       | 0.71<br>(0.61, 0.84)                                   | 3.85<br>(3.45, 4.29)                                                                                    | 5.32<br>(4.59, 6.09)                                                                                       | -1.50<br>(-2.27, -0.71)                                                      |
|                                           | <b>Dip&gt; 30%</b>       | 0.70<br>(0.52, 0.93)                                   | 8.22<br>(6.82, 9.88)                                                                                    | 11.66<br>(9.14, 14.34)                                                                                     | -3.38<br>(-6.42, -0.72)                                                      |

Model adjusted for both covariates measured at treatment initiation and characteristics evaluated within 6 months after treatment initiation.

\* Composite cardiovascular outcome was defined as non-fatal myocardial infarction, non-fatal stroke, hospitalization for heart failure or all-cause mortality

† Composite kidney outcome was defined as eGFR decline>50%, ESKD or all-cause mortality

**Figure S1. Cohort construction flow.**

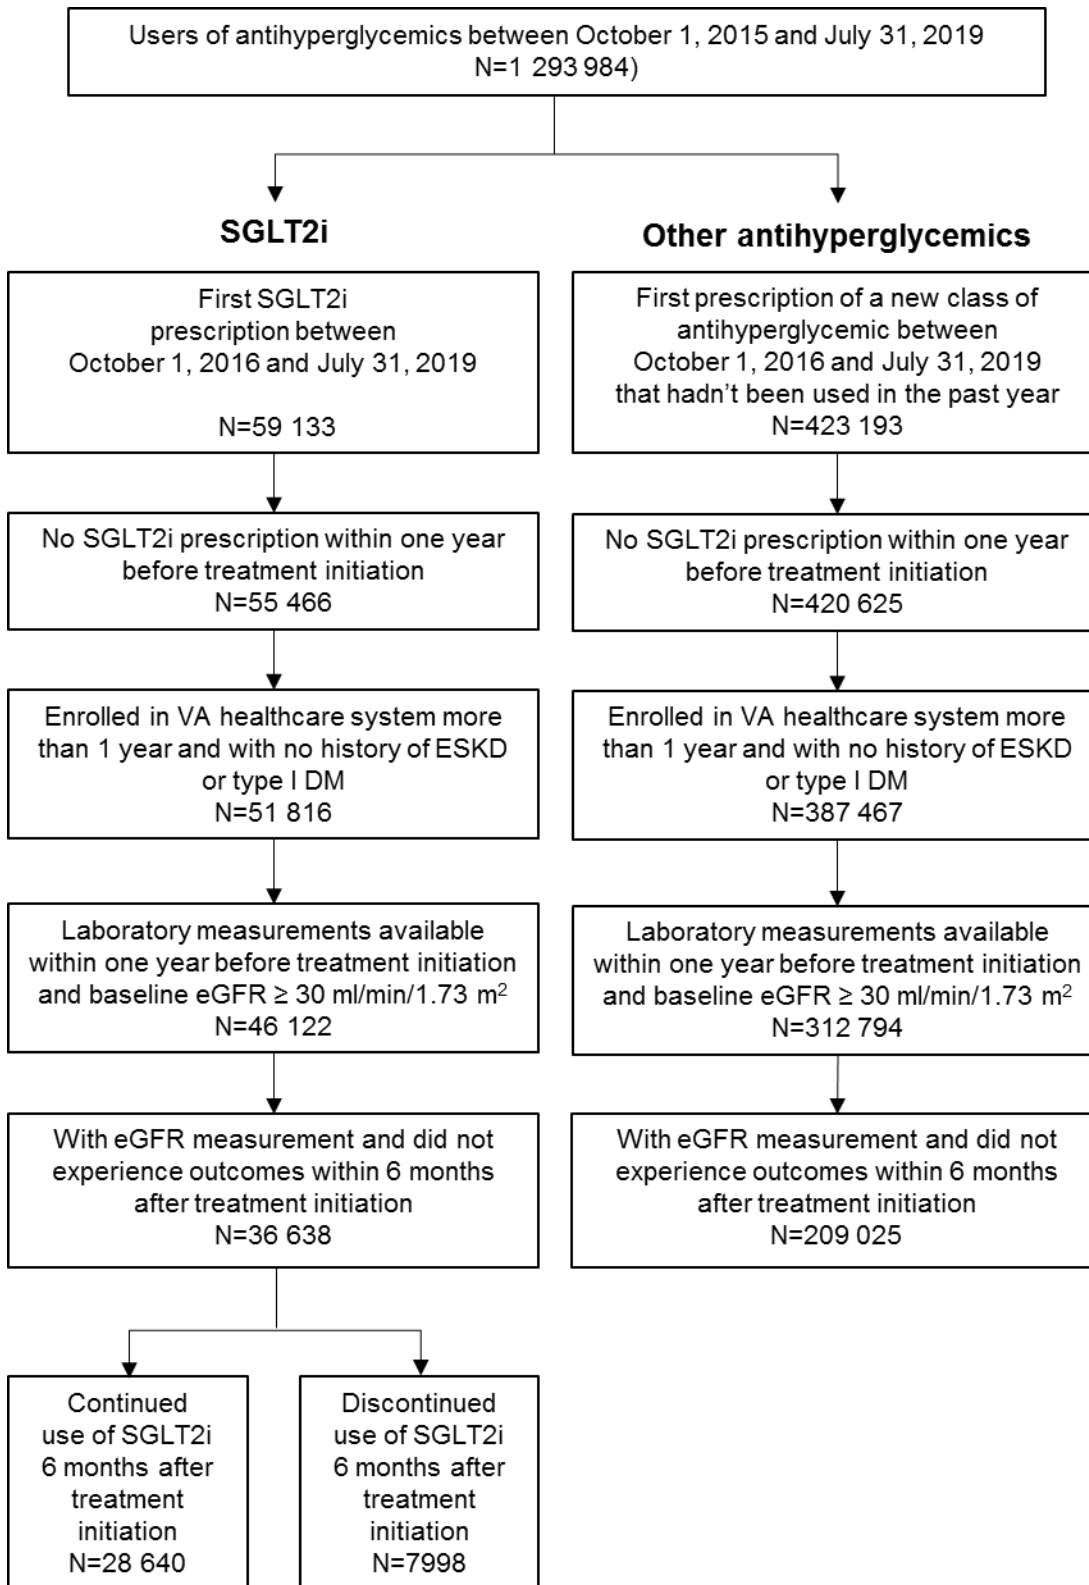

Figure S2. Study timeline.

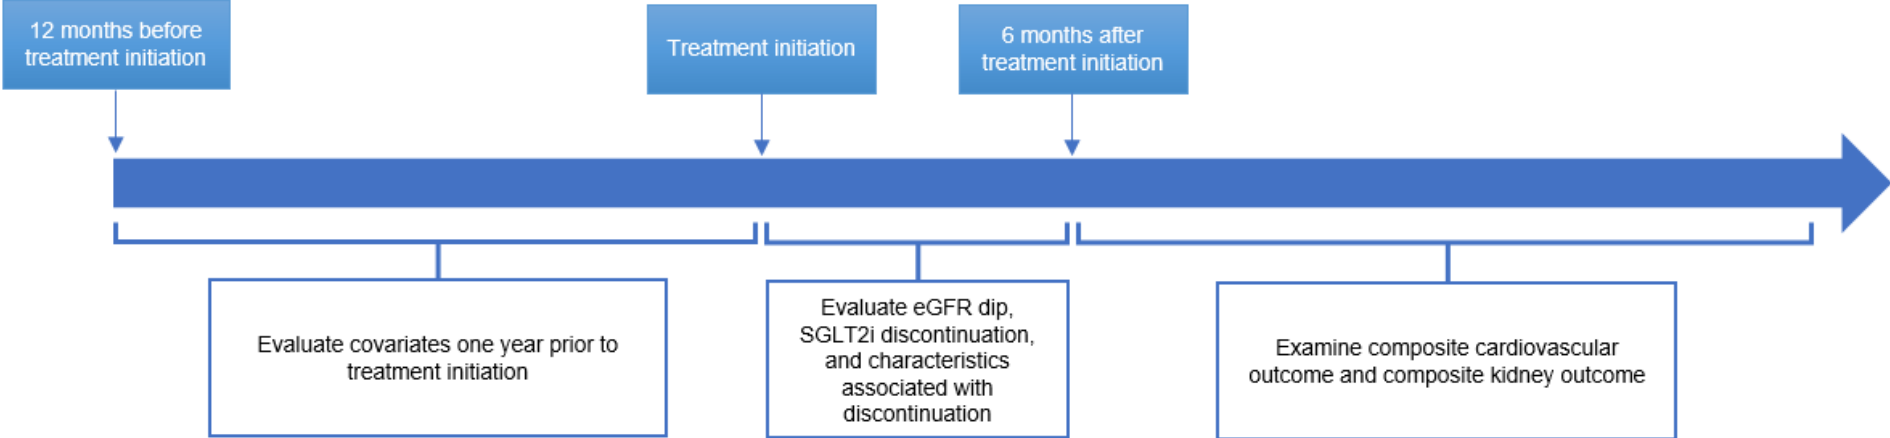

Figure S3. Analytic approach flowchart.

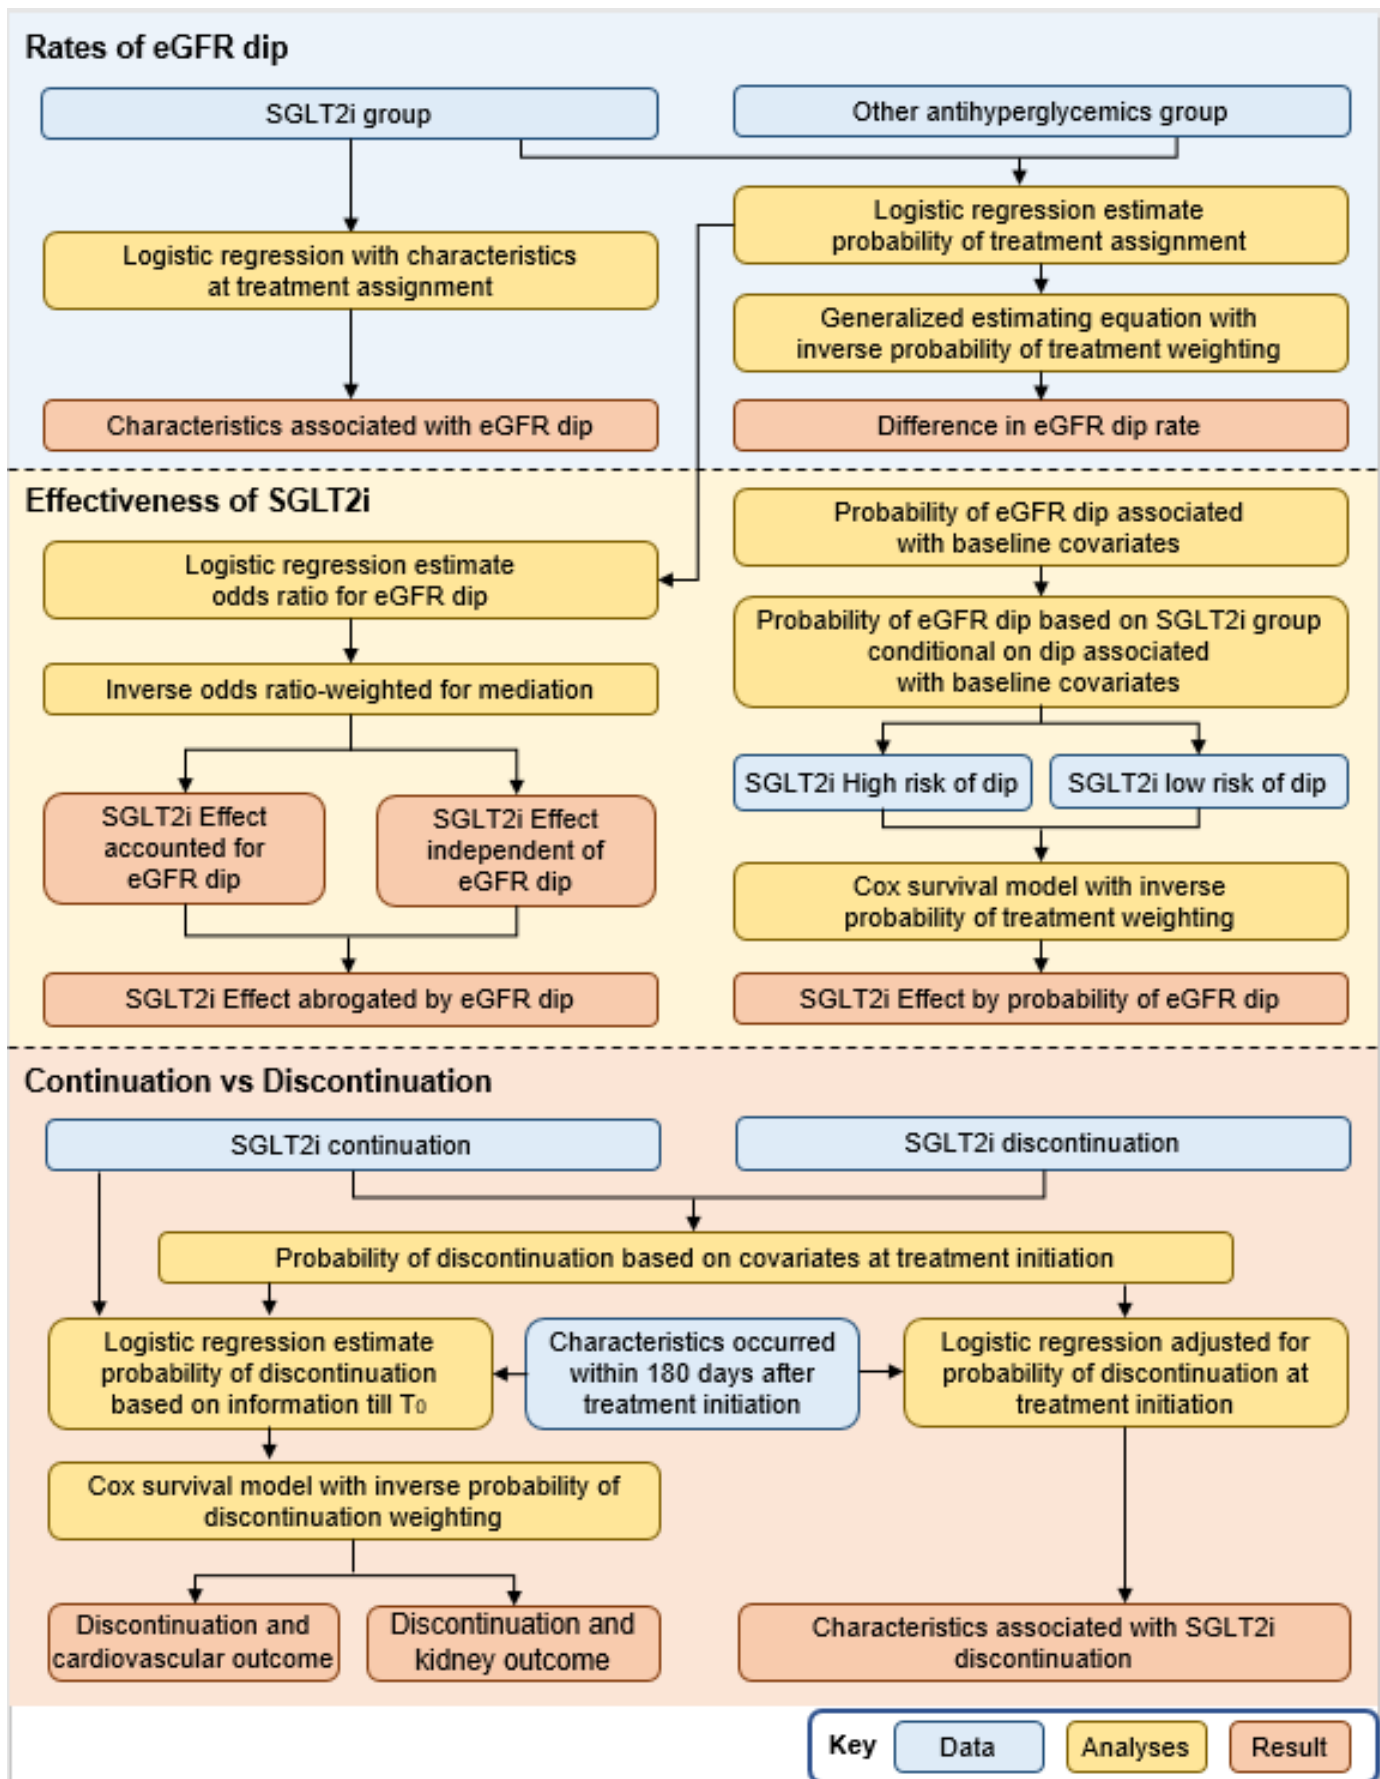

**Figure S4. Rates of eGFR dip in the first 6 months among users of SGLT2i and other antihyperglycemics.**

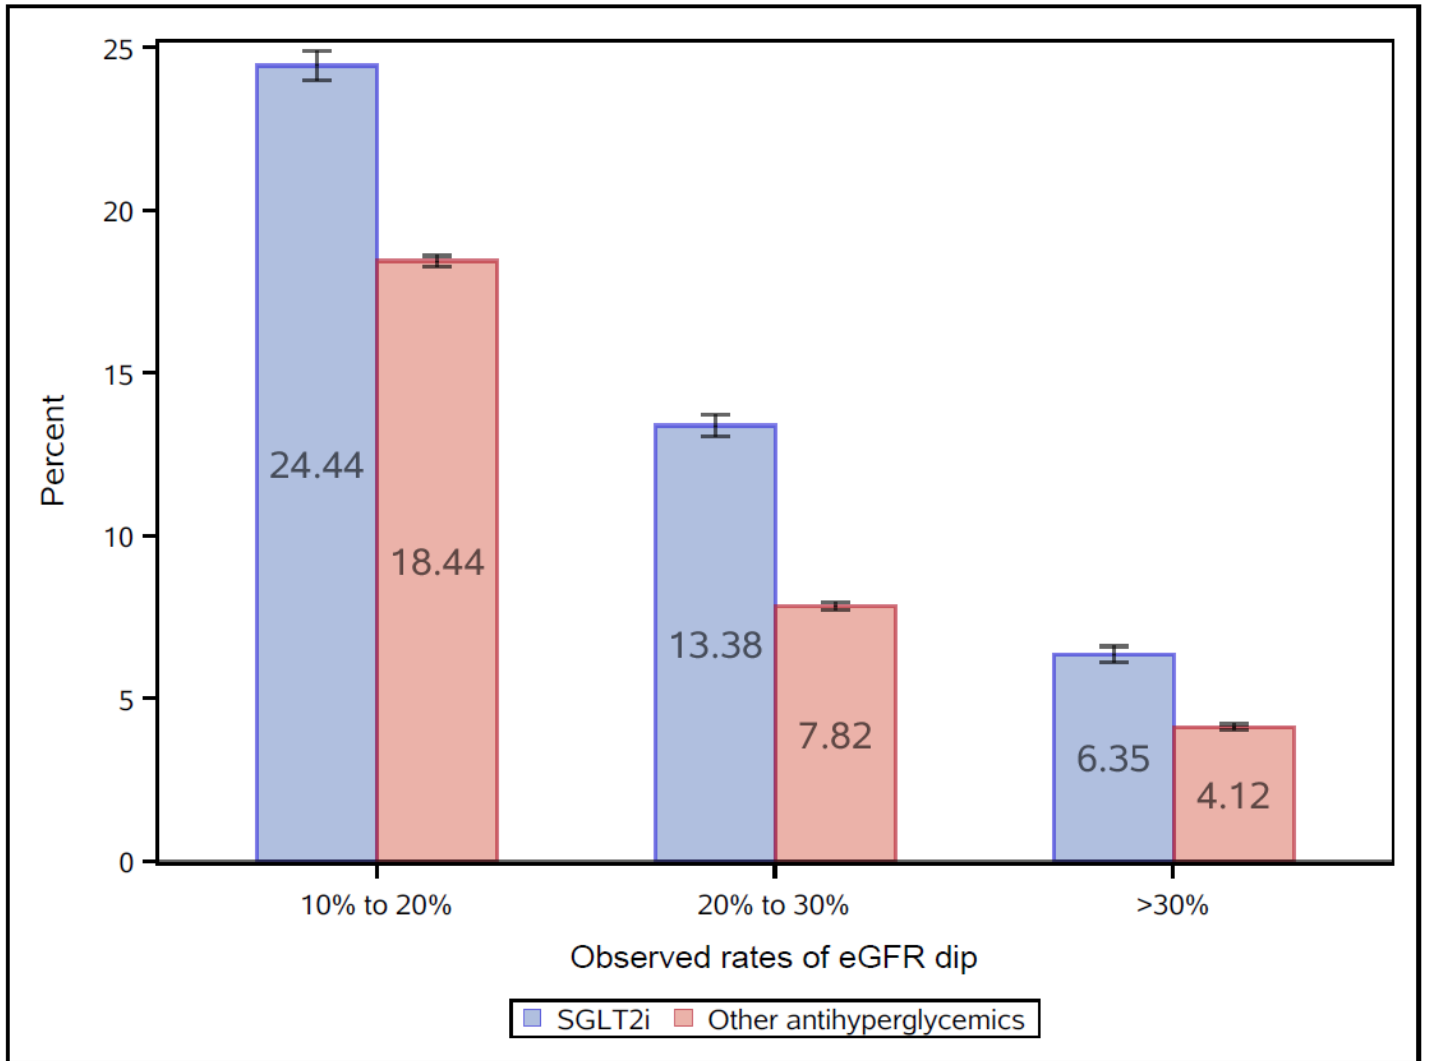

Observed rates of eGFR dip >10 to 20%, >20 to 30% and >30% in the SGLT2i group (blue) and the other antihyperglycemics group (red).

Figure S5a. Propensity score distribution in the SGLT2i and other antihyperglycemics groups before weighting

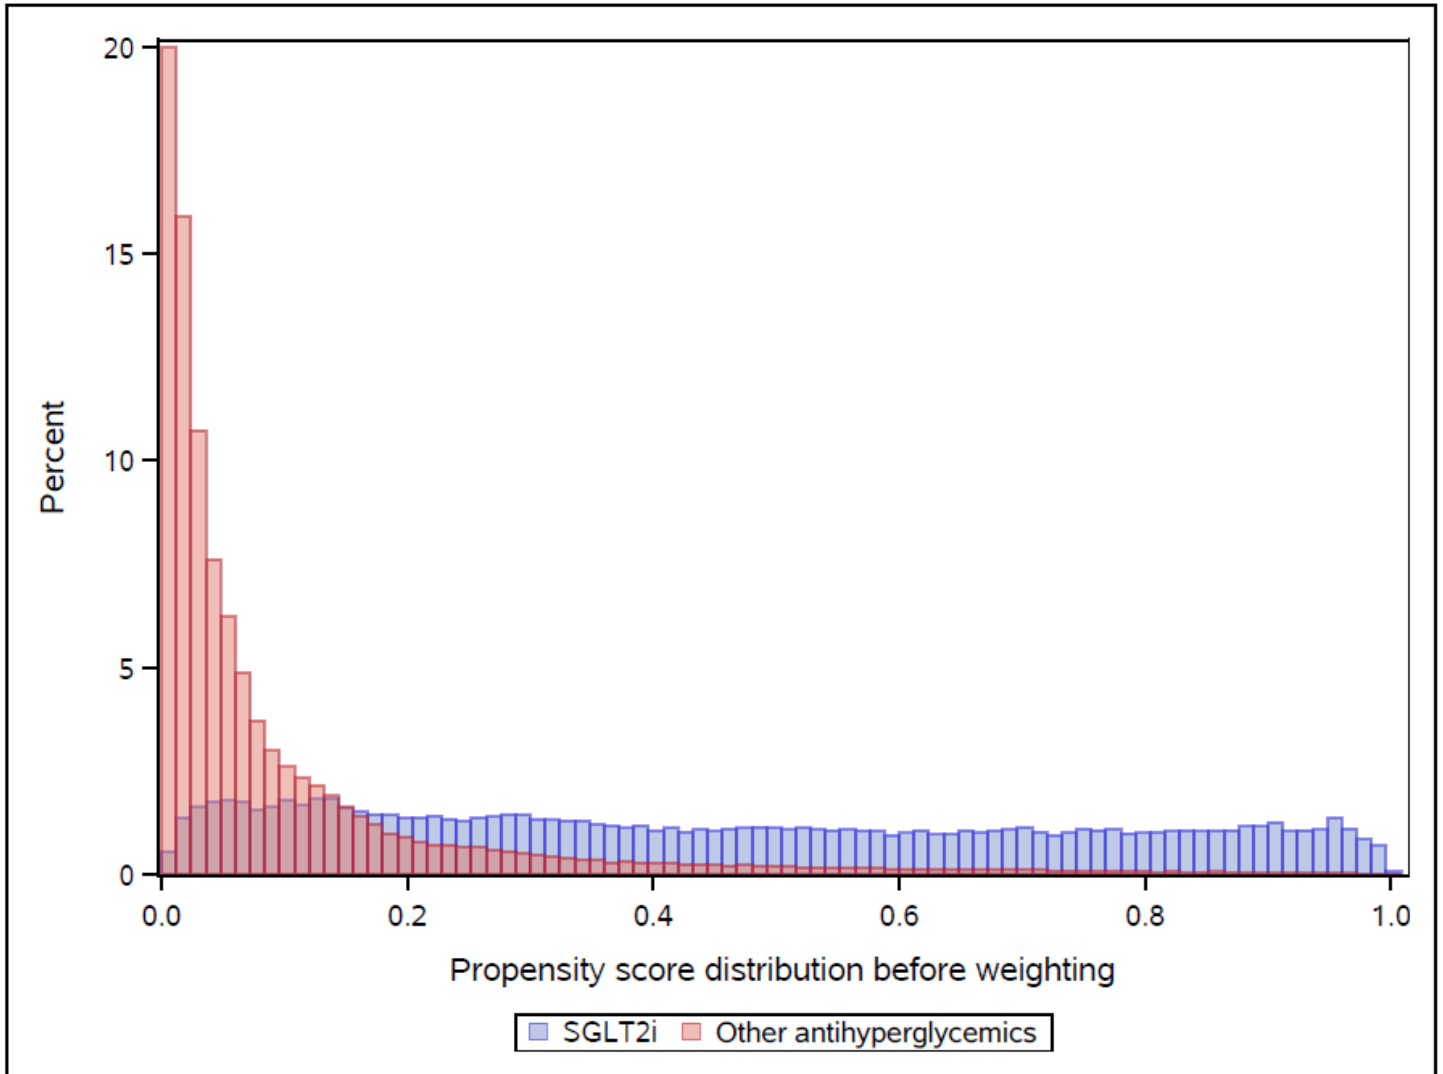

Figure S5b. Propensity score distribution in the SGLT2i and other antihyperglycemics groups after weighting.

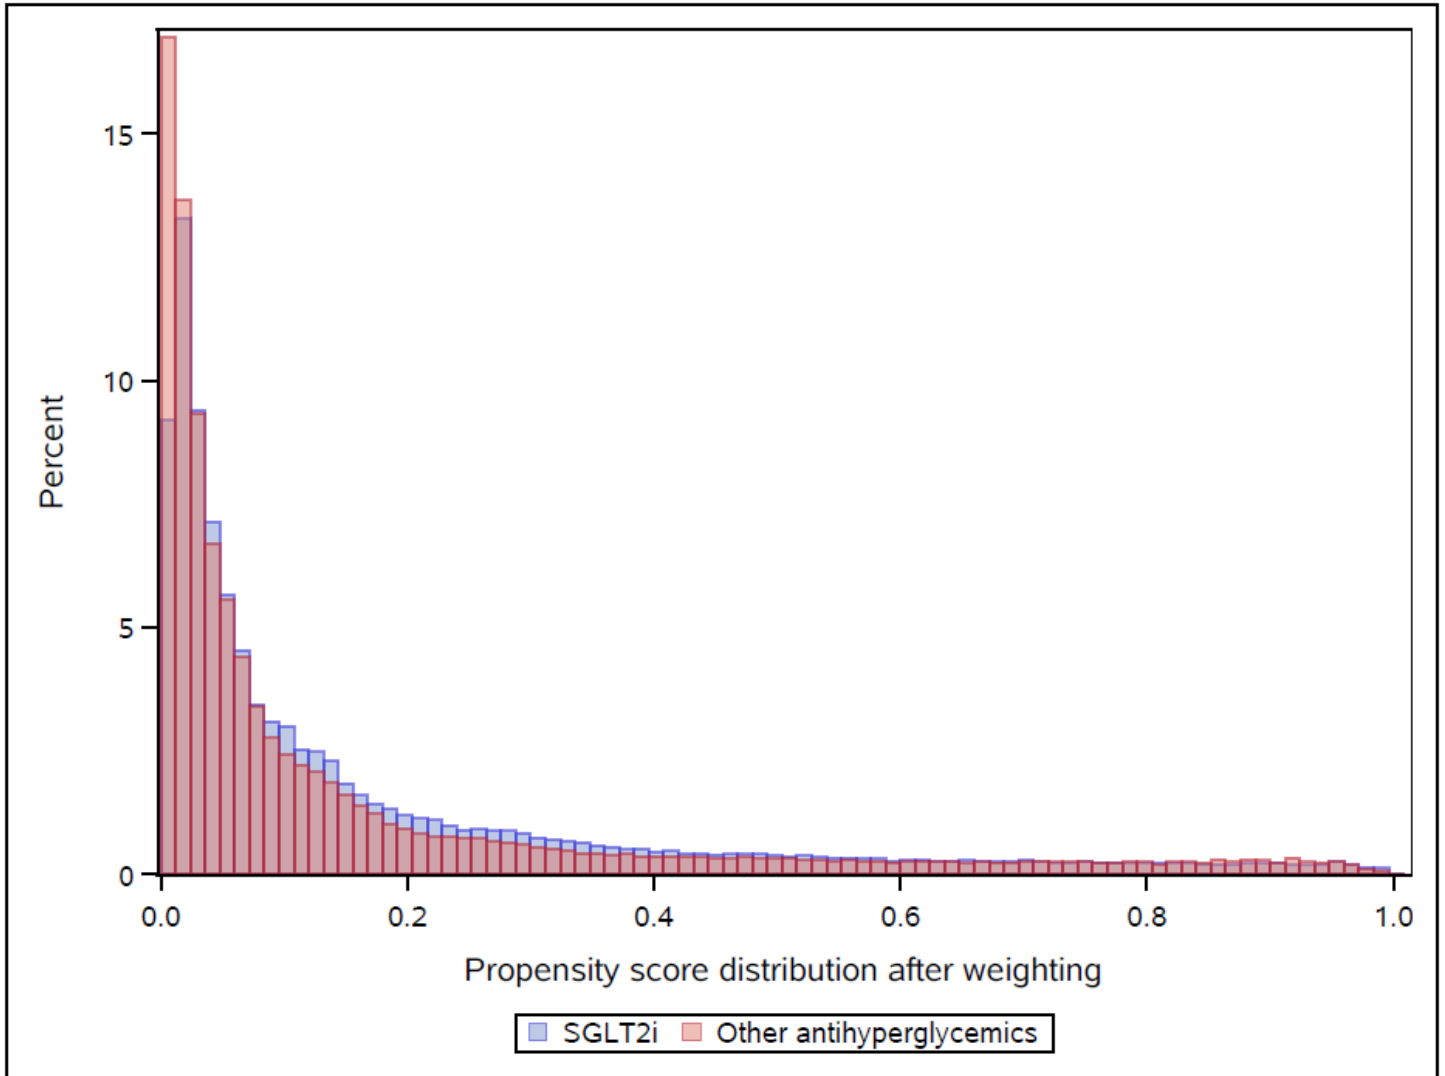

Figure S6a. Propensity score distribution before weighting for those who continued and those who discontinued SGLT2i treatment in the first 6 months.

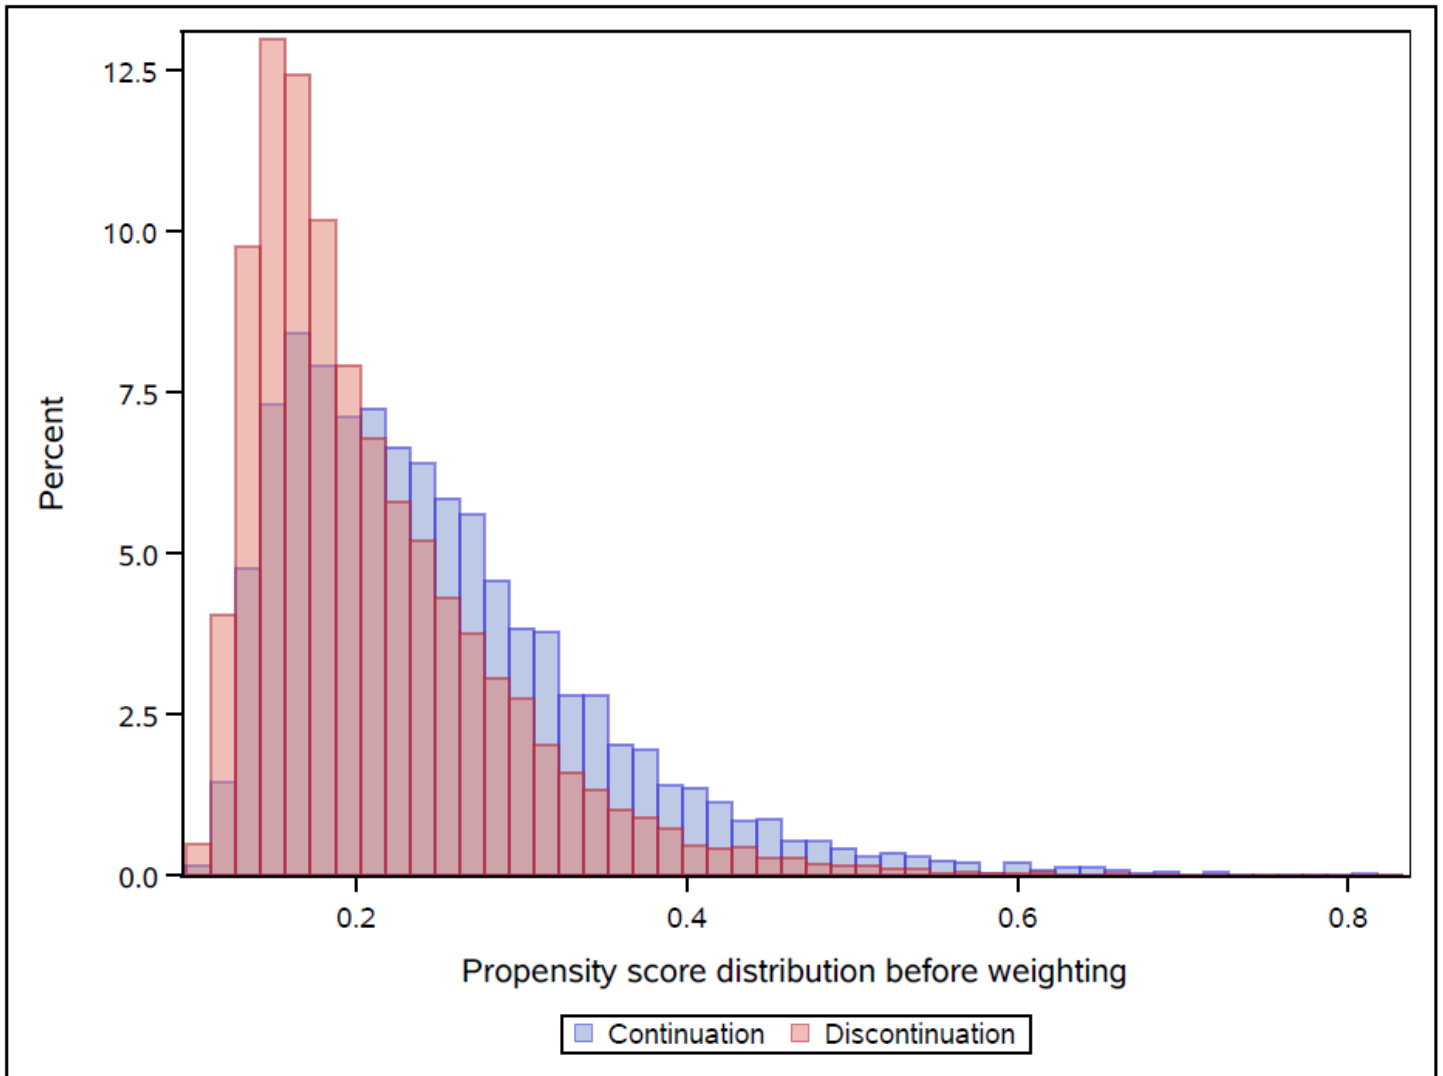



Figure S6b. Propensity score distribution after weighting for those who continued and those who discontinued SGLT2i treatment in the first 6 months.

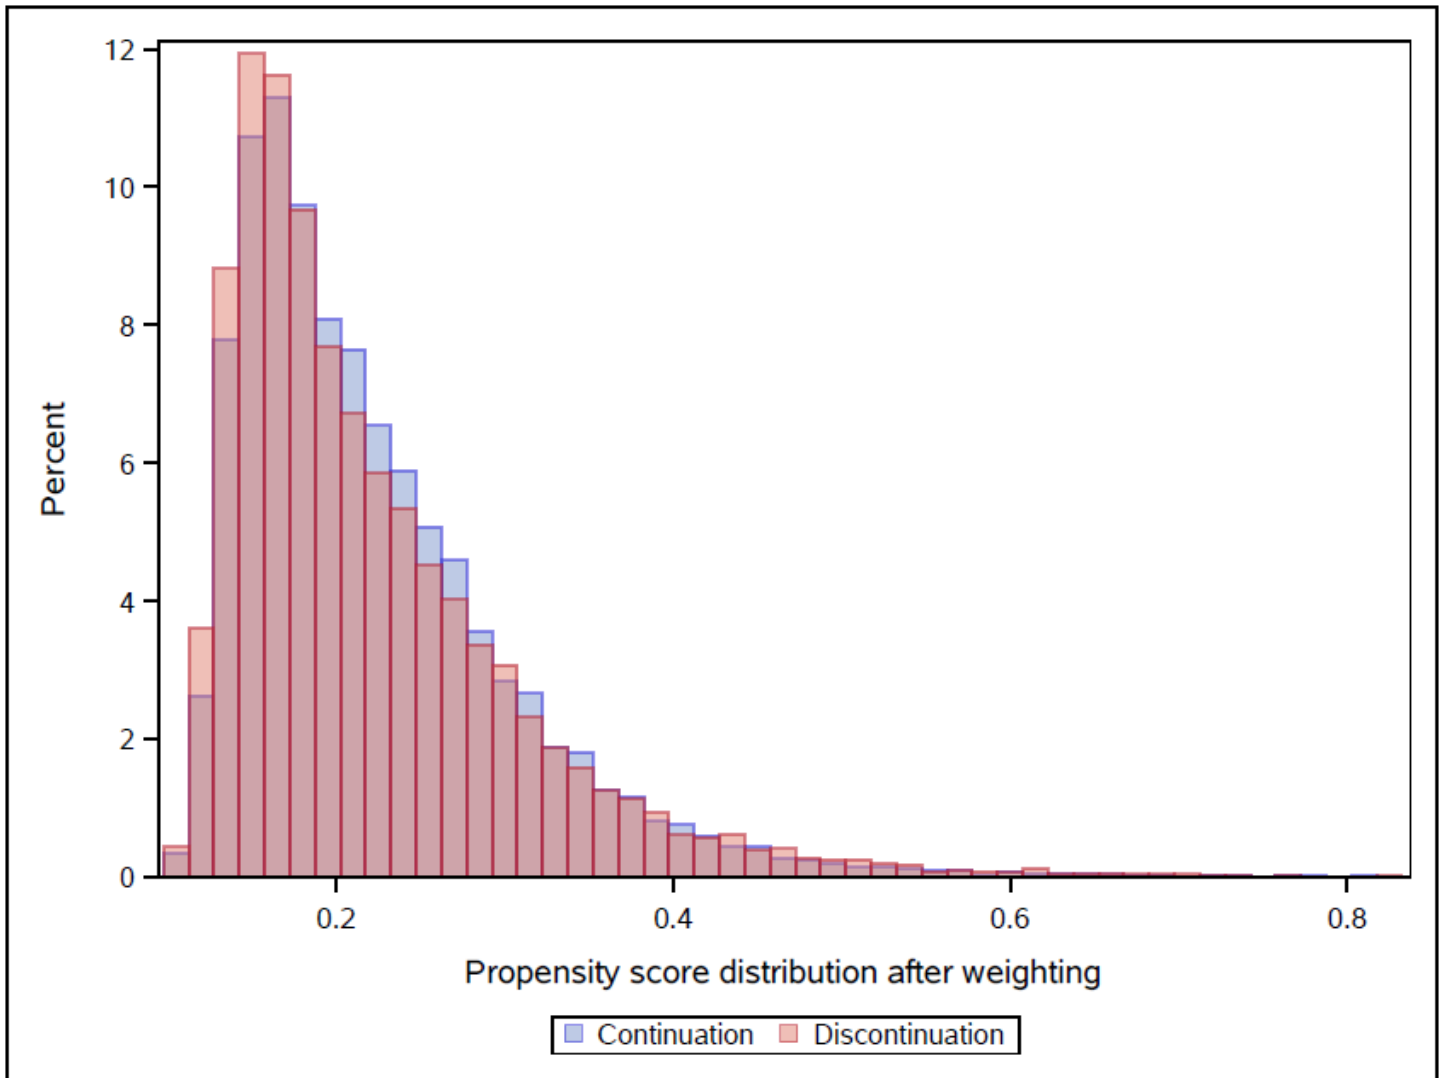

Figure S7a. Standardized difference of covariates between the treatment groups (SGLT2i and other antihyperglycemics) in the original cohort and the weighted cohort.

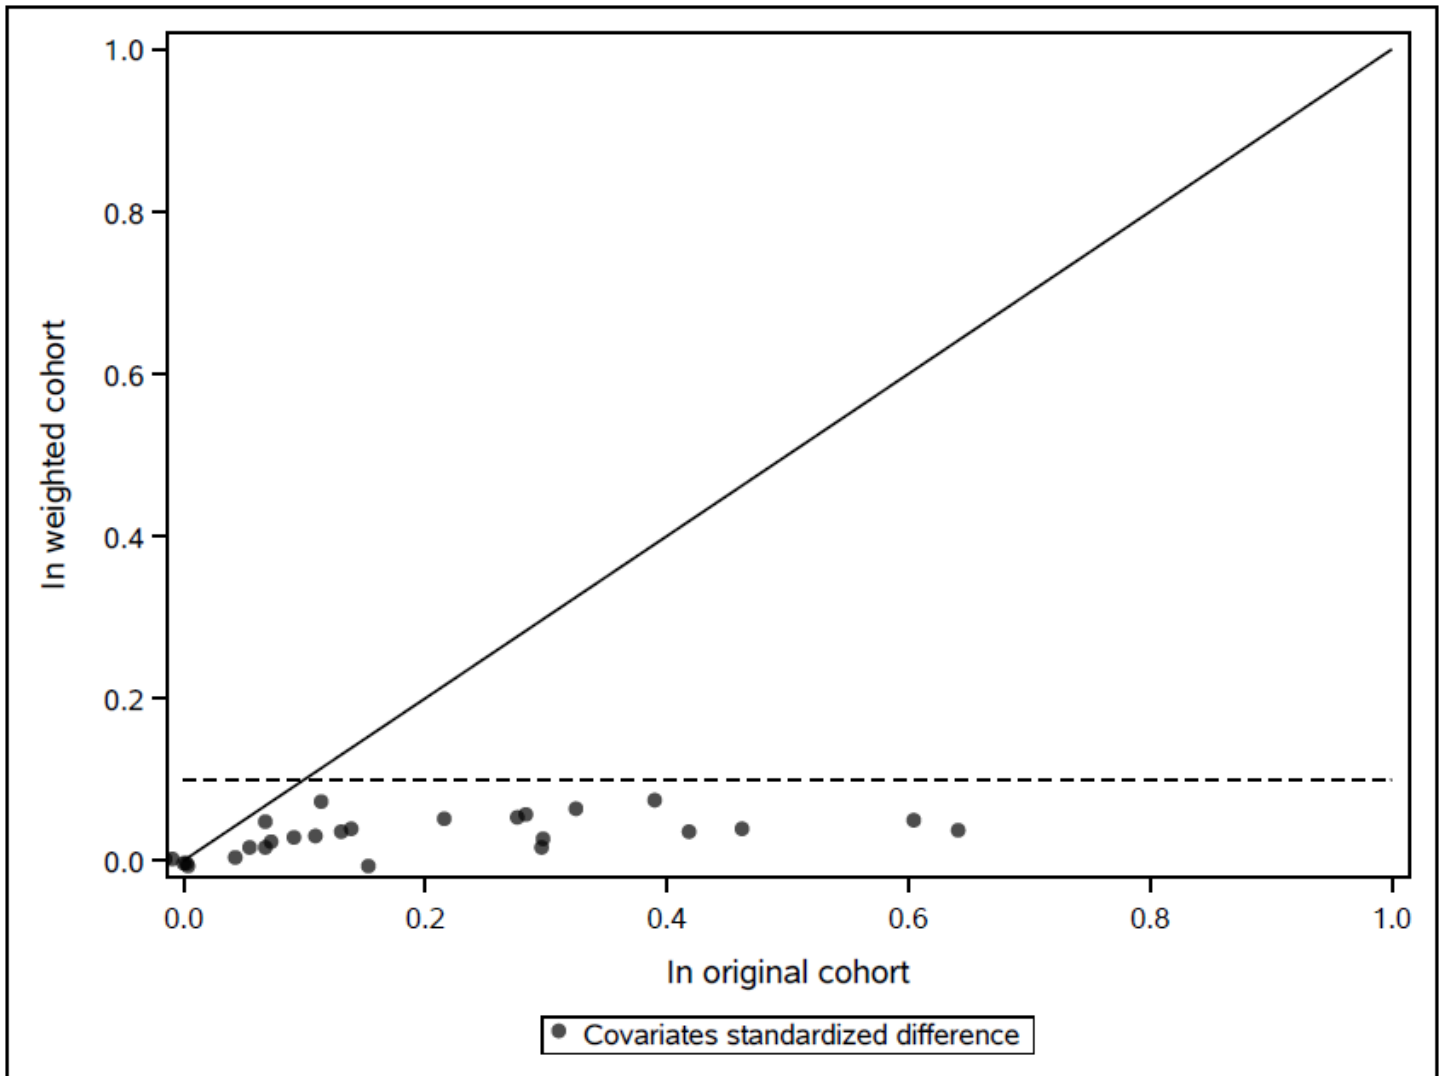

Standardized difference below 0.1 (below the dashed line) indicated the covariate is well balanced in the weighted cohort.

**Figure S7b. Standardized difference of covariates between those who continued and those who discontinued SGLT2i treatment in the first 6 months in the original cohort and the weighted cohort.**

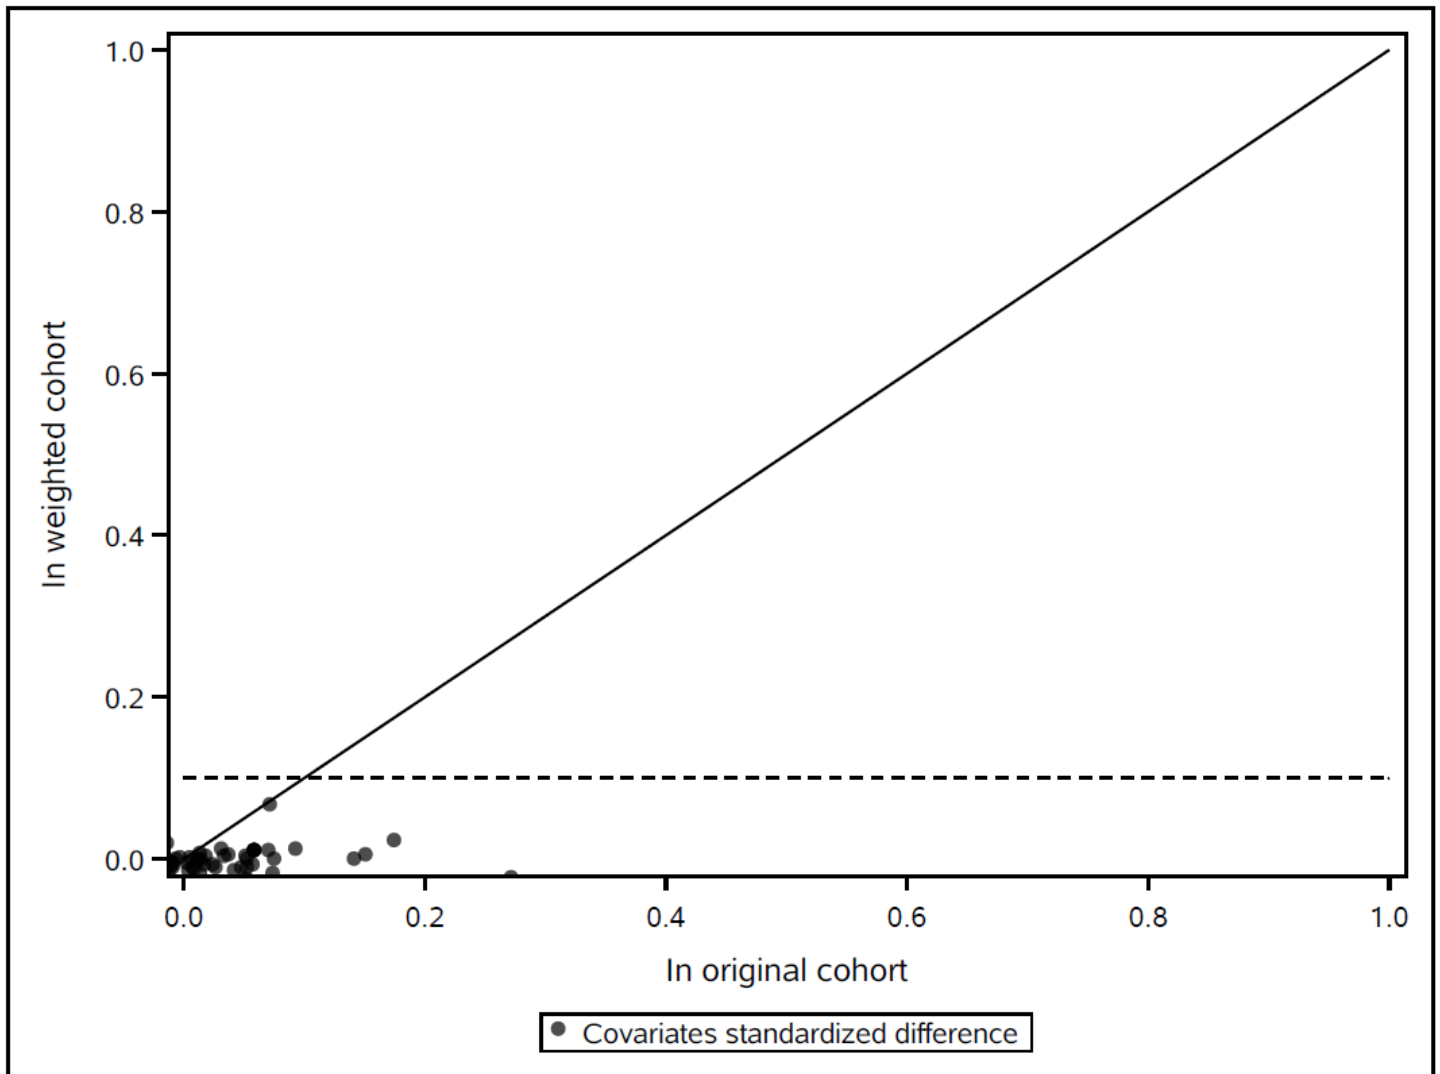

Standardized difference below 0.1 (below the dashed line) indicated the covariate is well balanced in the weighted cohort.
